# Supplementary material
Source: PubMed Central journal article supplement (PMC7640888)
Supplement: mmc1.pdf [file mmc1.pdf]

**Cell, Volume 183**

## **Supplemental Information**

### **Case Study: Prolonged Infectious SARS-CoV-2**

#### **Shedding from an Asymptomatic**

#### **Immunocompromised Individual with Cancer**

**Victoria A. Avanzato, M. Jeremiah Matson, Stephanie N. Seifert, Rhys Pryce, Brandi N. Williamson, Sarah L. Anzick, Kent Barbian, Seth D. Judson, Elizabeth R. Fischer, Craig Martens, Thomas A. Bowden, Emmie de Wit, Francis X. Riedo, and Vincent J. Munster**

**Table S1. Immunohistochemistry studies from L4 vertebral body biopsy on February 14, 2020. Related to Figure 1.** The patient underwent surgery for L4 vertebral body burst fracture, and a biopsy was taken from the L4 vertebral body during the operative repair.

| <b>Antibody</b> | <b>Result</b>      | <b>Comment</b>                       |
|-----------------|--------------------|--------------------------------------|
| CD20 L26        | Positive           | Present in mature B cell lymphocytes |
| CD3             | Negative           | Highlights T cells                   |
| BCL-2           | Positive           | Inhibits pro-apoptotic proteins      |
| Cyclin D1       | Negative           | Positive in mantle cell lymphoma     |
| Ki67 MIB1 sq    | Rare cell positive | <1%                                  |

**Table S2. Gammaglobulin transfusions. Related to Figure 1.**

| <b>Dispense Date</b> | <b>IVIG Product<br/>Manufacturer Grifols</b> | <b>Lot Number</b> | <b>NDC Number</b> | <b>Expiration Date</b> | <b>Collection Date</b> |
|----------------------|----------------------------------------------|-------------------|-------------------|------------------------|------------------------|
| March 7, 2020        | Flebogamma 20 grams                          | A4GLD00461        | 61953-0005-3      | 10-11-2021             | October 2017           |
|                      | Flebogamma 5 grams                           | A4GJC00281        | 61953-0005-1      | 12-16-2020             | December 2016          |
| April 6, 2020        | Flebogamma 20 grams                          | A4GLD00461        | 61953-0005-3      | 10-11-2021             | October 2017           |
|                      | Flebogamma 5 grams                           | A4GJC00281        | 61953-0005-1      | 12-16-2020             | December 2016          |

**Table S3. Additional laboratory values. Related to Figure 1.**

| DATE              | LAB                    | VALUE                       | NORMAL RANGE |
|-------------------|------------------------|-----------------------------|--------------|
| February 25, 2020 | White Blood Cell count | 34.3 x 10 <sup>3</sup> /μL  | 3.98-10.40   |
|                   | Hemoglobin             | 6.8 g/dl                    | 11.2-15.7    |
|                   | Hematocrit             | 22.6%                       | 34.1-44.9    |
|                   | Platelet               | 747 x 10 <sup>3</sup> /μL   | 182-369      |
|                   | Neutrophils            | 13.37 x 10 <sup>3</sup> /μL | 1.56-6.13    |
|                   | Immature neutrophils   | 0.69 x 10 <sup>3</sup> /μL  | 0.0-0.20     |
|                   | Lymphocytes            | 14.7 x 10 <sup>3</sup> /μL  | 1.2-3.7      |
|                   | Abnormal lymphocytes   | 2.40 x 10 <sup>3</sup> /μL  | 0            |
|                   | Reactive lymphocytes   | 0.34 x 10 <sup>3</sup> /μL  | 0            |
| March 5, 2020     | IgG                    | 303 mg/dl                   | 700-1600     |
| April 1, 2020     | IgG1                   | 600 mg/dl                   | 148-810      |
|                   | IgG2                   | 257 mg/dl                   | 130-555      |
|                   | IgG3                   | 34 mg/dl                    | 15-102       |
|                   | IgG1                   | 12 mg/dl                    | 2-96         |
|                   | LDH                    | 390 U/L                     | 110-221      |
| April 10, 2020    | IgG                    | 901 mg/dl                   | 586-1602     |
|                   | IgG                    | 951 mg/dl                   | 586-1602     |
|                   | IgM                    | 15 mg/dl                    | 26-217       |
|                   | IgA                    | 34 mg/dl                    | 64-422       |
| April 13, 2020    | C-reactive Protein     | 3.55 mg/dl                  | <1.5         |
| April 30, 2020    | IgG                    | 378 mg/dl                   | 586-1602     |
| May 1, 2020       | IgG                    | 290 mg/dl                   | 586-1602     |
| May 7, 2020       | CD4 count              | 1083 cells/ml               | 359-1083     |
|                   | CD4 %                  | 22%                         | 30.8-58.5    |

**Table S4: Genbank accession numbers and full genome names obtained directly from the patient samples and of the SARS-CoV-2 isolates. Related to Figure 4, Table 2.**

| <b>Genbank</b> | <b>Direct patient sample</b> | <b>Name</b>               | <b>Collection date</b> |
|----------------|------------------------------|---------------------------|------------------------|
| MT982403       | d49                          | hCoV-19/USA/WA-RML-1/2020 | 20-Apr-2020            |
| MT982402       | d70                          | hCoV-19/USA/WA-RML-2/2020 | 11-May-2020            |
| MT982405       | d85                          | hCoV-19/USA/WA-RML-3/2020 | 26-May-2020            |
| MT982406       | d105                         | hCoV-19/USA/WA-RML-4/2020 | 15-Jun-2020            |
|                |                              |                           |                        |
|                | <b>SARS-CoV-2 isolate</b>    |                           |                        |
| MT982401       | d49                          | hCoV-19/USA/WA-RML-5/2020 | 20-Apr-2020            |
| MT982404       | d70                          | hCoV-19/USA/WA-RML-6/2020 | 11-May-2020            |
